# Supplementary material for: The Correlates & Public Health Consequences of Prospective Vaccine Hesitancy among Individuals Who Received COVID-19 Vaccine Boosters in the U.S.
Source: MDPI journal article supplement (doi:10.3390/vaccines10111791), 2022-10-25
Supplement: s1 [file s1]

# Supplemental Materials For: The Social Correlates & Health Policy Consequences of Prospective Vaccine Hesitancy Among Individuals who Received COVID-19 Vaccine Boosters.

## Contents

|                                                                                   |          |
|-----------------------------------------------------------------------------------|----------|
| <b>Table S1. Comparison of Raw and Weighted Lucid Data to National Benchmarks</b> | <b>2</b> |
| <b>Supplemental Measurement Information</b>                                       | <b>3</b> |
| COVID-19 Vaccine Uptake (Initial Series) .....                                    | 3        |
| COVID-19 Vaccine Booster Status .....                                             | 3        |
| Additional Booster Intentions .....                                               | 3        |
| Political Ideology .....                                                          | 3        |
| Additional Demographics .....                                                     | 4        |

**Table S1. Comparison of Raw and Weighted Lucid Data to National Benchmarks**

| Variable       | Our Data<br>(Raw) | Our Data<br>(Weighted) | Benchmark    | Benchmark Source |
|----------------|-------------------|------------------------|--------------|------------------|
| Female         | 52%               | 51%                    | 51%          | CPS 2018         |
| College Degree | 39%               | 32%                    | 31%          | CPS 2018         |
| Black          | 10%               | 13%                    | 13%          | CPS 2018         |
| White          | 69%               | 63%                    | 62%          | CPS 2018         |
| Hispanic       | 12%               | 17%                    | 18%          | CPS 2018         |
| Democrat       | 34%               | 34%                    | 34%          | ANES (Wgt.)      |
| Republican     | 24%               | 24%                    | 28%          | ANES (Wgt.)      |
| Independent    | 42%               | 40%                    | 32%          | ANES (Wgt.)      |
| Mean Age       | 45                | 46                     | 47           | ANES (Wgt.)      |
| Median Income  | \$ 45 - 49,000    | \$ 60 - 64,999         | \$ 55-59,999 | ANES (Wgt.)      |

**Note.** Comparison of our data to known population benchmarks. CPS = Current Population Survey (US Census, 2018). ANES = American National Election Study (2016). We prefer to rely on CPS given its sample size and representativeness, but make use of weighted ANES data whenever it was not possible to use CPS (e.g., CPS does not ask questions about Party ID). Weights in column two adjust for gender, education, race, age, and income. Party ID is **not included** in our weighting formula, and is shown only due to the potential interests of those who might use or otherwise consume this data.

## **Supplemental Measurement Information**

### **COVID-19 Vaccine Uptake (Initial Series)**

Have you been fully vaccinated against COVID-19?  
(E.g., Two doses of Pfizer or Moderna;  
1 dose of Johnson & Johnson)

ROTATE RESPONSE OPTION ORDER

<1> Yes

<2> No

### **COVID-19 Vaccine Booster Status**

IF COVID VACCINE STATUS = YES

Have you received an additional "booster"  
COVID-19 vaccine in the past year?

<1> Yes

<2> No -- but I plan to

<3> No -- and I do not plan to

### **Additional Booster Intentions**

IF BOOSTER STATUS = YES

As you may know, public health experts now recommend that all adults receive an additional "booster" dose of the COVID-19 vaccine. They have also authorized additional (second) boosters for vulnerable populations.

If, in the future, federal regulators were to recommend that all Americans receive an additional (second) booster shot, in order to reduce the likelihood of becoming sick with COVID-19 and/or spreading it to others, how likely would you be to take the shot?

<1> Very likely

<2> Somewhat likely

<3> Not too likely

<4> Not likely at all

<5> I have already received a second booster for COVID-19

### **Political Ideology**

We hear a lot of talk these days about liberals and conservatives. Here is a seven-point scale on which the political views that people might hold are arranged from extremely liberal to extremely conservative.

Where would you place yourself on this scale?

<1> Extremely liberal

<2> Liberal

- <3> Slightly liberal
- <4> Moderate; middle of the road
- <5> Slightly conservative
- <6> Conservative
- <7> Extremely conservative

### **Additional Demographics**

All other demographic variables are measured as part of Lucid' s initial inventory survey, when inviting prospective panelists to join the service' s large, online, opt-in panel. Additional information about these measures can be found in the main text.
